# Supplementary material for: Pan-genomic perspective on the evolution of the Staphylococcus aureus USA300 epidemic
Source: PubMed Central journal article supplement (PMC5320670; doi:10.1099/mgen.0.000058), 2016-05-31

Table S1. Description of 191 CC8 *S. aureus* isolates analysed in this study.

| Public name | ENA accession | Organism | ST | <i>spa</i> | SCC <i>mec</i> | Clone  | Year | HC ID | State        | Patient type | Infection type |
|-------------|---------------|----------|----|------------|----------------|--------|------|-------|--------------|--------------|----------------|
| PFESA1490   | ERS410907     | MSSA     | 8  | t008       | -              | USA300 | 2009 | HC8   | Wisconsin    | Outpatient   | Other          |
| PFESA1492   | ERS410923     | MSSA     | 8  | t008       | -              | -      | 2009 | HC8   | Wisconsin    | Inpatient    | Other          |
| PFESA1606   | ERS410796     | MSSA     | 8  | t008       | -              | -      | 2009 | HC4   | New York     | Inpatient    | Invasive       |
| PFESA1614   | ERS410765     | MSSA     | 8  | t008       | -              | USA300 | 2009 | HC4   | New York     | Outpatient   | Invasive       |
| PFESA1788   | ERS410716     | MSSA     | 8  | t008       | -              | -      | 2009 | HC5   | Pennsylvania | Inpatient    | Invasive       |
| PFESA1885   | ERS410629     | MSSA     | 8  | t008       | -              | USA300 | 2009 | HC3   | Missouri     | Inpatient    | Other          |
| PFESA1975   | ERS411176     | MSSA     | 8  | t008       | -              | USA300 | 2010 | HC10  | Georgia      | Inpatient    | Invasive       |
| PFESA1976   | ERS411184     | MSSA     | 8  | t008       | -              | USA300 | 2010 | HC10  | Georgia      | Inpatient    | Respiratory    |
| PFESA2034   | ERS432065     | MSSA     | 8  | t008       | -              | USA300 | 2010 | HC9   | Wisconsin    | Outpatient   | Other          |
| PFESA2064   | ERS365748     | MSSA     | 8  | t008       | -              | USA300 | 2010 | HC7   | Texas        | Inpatient    | Wound          |
| PFESA2070   | ERS365796     | MSSA     | 8  | t008       | -              | USA300 | 2009 | HC7   | Texas        | Inpatient    | Wound          |
| PFESA2083   | ERS365797     | MSSA     | 8  | t008       | -              | -      | 2010 | HC1   | Florida      | Inpatient    | Invasive       |
| PFESA2084   | ERS365805     | MSSA     | 8  | t008       | -              | USA300 | 2010 | HC1   | Florida      | Inpatient    | Other          |
| PFESA2091   | ERS365766     | MSSA     | 8  | t008       | -              | USA300 | 2010 | HC1   | Florida      | Inpatient    | Other          |
| PFESA2161   | ERS365815     | MSSA     | 8  | t008       | -              | USA300 | 2010 | HC2   | Michigan     | Inpatient    | Respiratory    |
| PFESA2175   | ERS410378     | MSSA     | 8  | t008       | -              | -      | 2010 | HC2   | Michigan     | Outpatient   | Respiratory    |
| PFESA2178   | ERS410402     | MSSA     | 8  | t008       | -              | USA300 | 2009 | HC11  | Florida      | Inpatient    | Other          |
| PFESA2180   | ERS410418     | MSSA     | 8  | t008       | -              | USA300 | 2009 | HC11  | Florida      | Inpatient    | Wound          |
| PFESA2184   | ERS410450     | MSSA     | 8  | t008       | -              | USA300 | 2009 | HC11  | Florida      | Inpatient    | Other          |
| PFESA2196   | ERS410451     | MSSA     | 8  | t008       | -              | -      | 2010 | HC12  | Pennsylvania | Inpatient    | Wound          |
| PFESA2274   | ERS365784     | MSSA     | 8  | t008       | -              | USA300 | 2010 | HC6   | Tennessee    | Inpatient    | Invasive       |
| PFESA2298   | ERS365754     | MSSA     | 8  | t008       | -              | USA300 | 2010 | HC2   | Michigan     | Inpatient    | Wound          |
| PFESA2303   | ERS365794     | MSSA     | 8  | t008       | -              | -      | 2010 | HC2   | Michigan     | Inpatient    | Other          |
| PFESA2332   | ERS410342     | MSSA     | 8  | t008       | -              | -      | 2010 | HC8   | Wisconsin    | Outpatient   | Wound          |
| PFESA2413   | ERS365826     | MSSA     | 8  | t008       | -              | USA300 | 2010 | HC7   | Texas        | Inpatient    | Respiratory    |

Table S1. Description of 191 CC8 *S. aureus* isolates analysed in this study.

| Public name | ENA accession | Organism | ST | <i>spa</i> | SCC <i>mec</i> | Clone  | Year | HC ID | State        | Patient type | Infection type |
|-------------|---------------|----------|----|------------|----------------|--------|------|-------|--------------|--------------|----------------|
| PFESA2417   | ERS411049     | MSSA     | 8  | t008       | -              | USA300 | 2010 | HC7   | Texas        | Inpatient    | Respiratory    |
| PFESA2432   | ERS410215     | MSSA     | 8  | t008       | -              | -      | 2010 | HC5   | Pennsylvania | Inpatient    | Invasive       |
| PFESA2449   | ERS432202     | MSSA     | 8  | t008       | -              | USA300 | 2010 | HC3   | Missouri     | Inpatient    | Wound          |
| PFESA2453   | ERS432139     | MSSA     | 8  | t008       | -              | USA300 | 2010 | HC9   | Wisconsin    | Outpatient   | Wound          |
| PFESA2460   | ERS432195     | MSSA     | 8  | t008       | -              | USA300 | 2010 | HC9   | Wisconsin    | Inpatient    | Other          |
| PFESA1306   | ERS411147     | MRSA     | 8  | t008       | IVa            | USA300 | 2004 | HC7   | Texas        | Inpatient    | Wound          |
| PFESA1308   | ERS411163     | MRSA     | 8  | t008       | IVa            | USA300 | 2004 | HC7   | Texas        | Inpatient    | Invasive       |
| PFESA1309   | ERS411171     | MRSA     | 8  | t008       | IVa            | USA300 | 2004 | HC7   | Texas        | Inpatient    | Wound          |
| PFESA1311   | ERS411179     | MRSA     | 8  | t008       | IVa            | USA300 | 2004 | HC7   | Texas        | Inpatient    | Wound          |
| PFESA1312   | ERS411187     | MRSA     | 8  | t008       | IVa            | USA300 | 2004 | HC7   | Texas        | Inpatient    | Wound          |
| PFESA1317   | ERS411132     | MRSA     | 8  | t008       | IVa            | USA300 | 2004 | HC7   | Texas        | Inpatient    | Invasive       |
| PFESA1322   | ERS411172     | MRSA     | 8  | t008       | IVa            | USA300 | 2004 | HC7   | Texas        | Inpatient    | Wound          |
| PFESA1326   | ERS411112     | MRSA     | 8  | t008       | IVa            | USA300 | 2004 | HC1   | Florida      | Outpatient   | Wound          |
| PFESA1328   | ERS411204     | MRSA     | 8  | t008       | IVa            | USA300 | 2004 | HC1   | Florida      | Inpatient    | Wound          |
| PFESA1329   | ERS410929     | MRSA     | 8  | t008       | IVa            | USA300 | 2004 | HC1   | Florida      | Outpatient   | Wound          |
| PFESA1333   | ERS411133     | MRSA     | 8  | t008       | IVa            | USA300 | 2004 | HC1   | Florida      | Inpatient    | Invasive       |
| PFESA1335   | ERS411213     | MRSA     | 8  | t008       | IVa            | USA300 | 2004 | HC1   | Florida      | Inpatient    | Respiratory    |
| PFESA1339   | ERS411205     | MRSA     | 8  | t008       | IVa            | USA300 | 2004 | HC1   | Florida      | Inpatient    | Wound          |
| PFESA1341   | ERS410977     | MRSA     | 8  | t008       | IVa            | USA300 | 2004 | HC1   | Florida      | Outpatient   | Other          |
| PFESA1342   | ERS410985     | MRSA     | 8  | t008       | IVa            | USA300 | 2004 | HC1   | Florida      | Outpatient   | Wound          |
| PFESA1345   | ERS411009     | MRSA     | 8  | t008       | IVa            | USA300 | 2004 | HC1   | Florida      | Outpatient   | Other          |
| PFESA1347   | ERS411017     | MRSA     | 8  | t008       | IVa            | USA300 | 2004 | HC1   | Florida      | Outpatient   | Wound          |
| PFESA1350   | ERS411173     | MRSA     | 8  | t008       | IVa            | USA300 | 2004 | HC10  | Georgia      | Inpatient    | Wound          |
| PFESA1352   | ERS410946     | MRSA     | 8  | t008       | IVa            | USA300 | 2004 | HC10  | Georgia      | Outpatient   | Wound          |
| PFESA1353   | ERS410954     | MRSA     | 8  | t008       | IVa            | USA300 | 2004 | HC10  | Georgia      | Outpatient   | Wound          |

Table S1. Description of 191 CC8 *S. aureus* isolates analysed in this study.

| Public name | ENA accession | Organism | ST | <i>spa</i> | SCC <i>mec</i> | Clone  | Year | HC ID | State     | Patient type | Infection type |
|-------------|---------------|----------|----|------------|----------------|--------|------|-------|-----------|--------------|----------------|
| PFESA1354   | ERS410962     | MRSA     | 8  | t008       | IVa            | USA300 | 2004 | HC10  | Georgia   | Outpatient   | Wound          |
| PFESA1355   | ERS410970     | MRSA     | 8  | t008       | IVa            | USA300 | 2004 | HC10  | Georgia   | Outpatient   | Other          |
| PFESA1357   | ERS410986     | MRSA     | 8  | t008       | IVa            | USA300 | 2004 | HC10  | Georgia   | Outpatient   | Other          |
| PFESA1358   | ERS410994     | MRSA     | 8  | t008       | IVa            | USA300 | 2004 | HC10  | Georgia   | Outpatient   | Other          |
| PFESA1359   | ERS411002     | MRSA     | 8  | t008       | IVa            | USA300 | 2004 | HC10  | Georgia   | Outpatient   | Other          |
| PFESA1360   | ERS411010     | MRSA     | 8  | t008       | IVa            | USA300 | 2004 | HC10  | Georgia   | Outpatient   | Other          |
| PFESA1362   | ERS411018     | MRSA     | 8  | t008       | IVa            | USA300 | 2004 | HC10  | Georgia   | Outpatient   | Other          |
| PFESA1364   | ERS410939     | MRSA     | 8  | t008       | IVa            | USA300 | 2004 | HC10  | Georgia   | Outpatient   | Other          |
| PFESA1365   | ERS411157     | MRSA     | 8  | t008       | IVa            | USA300 | 2004 | HC10  | Georgia   | Inpatient    | Other          |
| PFESA1366   | ERS411149     | MRSA     | 8  | t008       | IVa            | USA300 | 2004 | HC10  | Georgia   | Inpatient    | Other          |
| PFESA1368   | ERS411141     | MRSA     | 8  | t008       | IVa            | USA300 | 2004 | HC10  | Georgia   | Inpatient    | Wound          |
| PFESA1369   | ERS410955     | MRSA     | 8  | t008       | IVa            | USA300 | 2004 | HC10  | Georgia   | Outpatient   | Other          |
| PFESA1371   | ERS411126     | MRSA     | 8  | t008       | IVa            | USA300 | 2004 | HC10  | Georgia   | Inpatient    | Other          |
| PFESA1391   | ERS411150     | MRSA     | 8  | t008       | IVa            | USA300 | 2004 | HC6   | Tennessee | Inpatient    | Other          |
| PFESA1398   | ERS411020     | MRSA     | 8  | t008       | IVa            | USA300 | 2004 | HC6   | Tennessee | Outpatient   | Wound          |
| PFESA1399   | ERS410933     | MRSA     | 8  | t008       | IVa            | USA300 | 2004 | HC6   | Tennessee | Outpatient   | Wound          |
| PFESA1404   | ERS410949     | MRSA     | 8  | t008       | IVa            | USA300 | 2004 | HC6   | Tennessee | Outpatient   | Other          |
| PFESA1410   | ERS411167     | MRSA     | 8  | t008       | IVa            | USA300 | 2004 | HC6   | Tennessee | Inpatient    | Other          |
| PFESA1476   | ERS410890     | MRSA     | 8  | t008       | IVa            | USA300 | 2010 | HC8   | Wisconsin | Inpatient    | Wound          |
| PFESA1477   | ERS410898     | MRSA     | 8  | t008       | IVa            | USA300 | 2010 | HC8   | Wisconsin | Outpatient   | Other          |
| PFESA1485   | ERS410867     | MRSA     | 8  | t008       | IVa            | USA300 | 2009 | HC8   | Wisconsin | Inpatient    | Other          |
| PFESA1489   | ERS410899     | MRSA     | 8  | t008       | IVa            | USA300 | 2009 | HC8   | Wisconsin | Outpatient   | Wound          |
| PFESA1491   | ERS410915     | MRSA     | 8  | t008       | IVa            | USA300 | 2009 | HC8   | Wisconsin | Outpatient   | Wound          |
| PFESA1497   | ERS410868     | MRSA     | 8  | t008       | IVa            | USA300 | 2009 | HC8   | Wisconsin | Inpatient    | Other          |
| PFESA1498   | ERS410876     | MRSA     | 8  | t008       | IVa            | USA300 | 2009 | HC8   | Wisconsin | Inpatient    | Other          |

Table S1. Description of 191 CC8 *S. aureus* isolates analysed in this study.

| Public name | ENA accession | Organism | ST | <i>spa</i> | SCC <i>mec</i> | Clone  | Year | HC ID | State        | Patient type | Infection type |
|-------------|---------------|----------|----|------------|----------------|--------|------|-------|--------------|--------------|----------------|
| PFESA1532   | ERS410863     | MRSA     | 8  | t008       | IVa            | USA300 | 2009 | HC12  | Pennsylvania | Inpatient    | Other          |
| PFESA1537   | ERS410903     | MRSA     | 8  | t008       | IVa            | USA300 | 2009 | HC12  | Pennsylvania | unknown      | Wound          |
| PFESA1538   | ERS410911     | MRSA     | 8  | t008       | IVa            | USA300 | 2009 | HC12  | Pennsylvania | Inpatient    | Respiratory    |
| PFESA1541   | ERS410840     | MRSA     | 8  | t008       | IVa            | USA300 | 2009 | HC12  | Pennsylvania | Inpatient    | Other          |
| PFESA1545   | ERS410872     | MRSA     | 8  | t008       | IVa            | USA300 | 2009 | HC12  | Pennsylvania | Inpatient    | Wound          |
| PFESA1547   | ERS410888     | MRSA     | 8  | t008       | IVa            | USA300 | 2009 | HC12  | Pennsylvania | Inpatient    | Respiratory    |
| PFESA1579   | ERS410747     | MRSA     | 8  | t008       | IVa            | USA300 | 2009 | HC6   | Tennessee    | Outpatient   | Wound          |
| PFESA1580   | ERS410755     | MRSA     | 8  | t008       | IVa            | USA300 | 2009 | HC6   | Tennessee    | Outpatient   | Wound          |
| PFESA1583   | ERS410771     | MRSA     | 8  | t008       | IVa            | USA300 | 2009 | HC6   | Tennessee    | Outpatient   | Other          |
| PFESA1584   | ERS410779     | MRSA     | 8  | t008       | IVa            | USA300 | 2009 | HC6   | Tennessee    | Outpatient   | Wound          |
| PFESA1585   | ERS411199     | MRSA     | 8  | t008       | IVa            | USA300 | 2009 | HC6   | Tennessee    | Inpatient    | Wound          |
| PFESA1586   | ERS410787     | MRSA     | 8  | t008       | IVa            | USA300 | 2009 | HC6   | Tennessee    | Outpatient   | Other          |
| PFESA1589   | ERS410811     | MRSA     | 8  | t008       | IVa            | USA300 | 2009 | HC6   | Tennessee    | Outpatient   | Wound          |
| PFESA1590   | ERS411207     | MRSA     | 8  | t008       | IVa            | USA300 | 2009 | HC6   | Tennessee    | Inpatient    | Other          |
| PFESA1591   | ERS410819     | MRSA     | 8  | t008       | IVa            | USA300 | 2009 | HC6   | Tennessee    | Outpatient   | Other          |
| PFESA1593   | ERS410740     | MRSA     | 8  | t008       | IVa            | USA300 | 2009 | HC6   | Tennessee    | Outpatient   | Other          |
| PFESA1594   | ERS410748     | MRSA     | 8  | t008       | IVa            | USA300 | 2009 | HC6   | Tennessee    | Outpatient   | Other          |
| PFESA1618   | ERS410797     | MRSA     | 8  | t008       | IVa            | USA300 | 2009 | HC4   | New York     | Outpatient   | Wound          |
| PFESA1785   | ERS410692     | MRSA     | 8  | t008       | IVa            | USA300 | 2009 | HC5   | Pennsylvania | Inpatient    | Respiratory    |
| PFESA1787   | ERS410708     | MRSA     | 8  | t008       | IVa            | USA300 | 2009 | HC5   | Pennsylvania | Inpatient    | Respiratory    |
| PFESA1791   | ERS410645     | MRSA     | 8  | t008       | IVa            | USA300 | 2009 | HC5   | Pennsylvania | Inpatient    | Respiratory    |
| PFESA1880   | ERS410589     | MRSA     | 8  | t008       | IVa            | USA300 | 2010 | HC3   | Missouri     | Inpatient    | Other          |
| PFESA1882   | ERS410605     | MRSA     | 8  | t008       | IVa            | USA300 | 2009 | HC3   | Missouri     | Inpatient    | Other          |
| PFESA1883   | ERS410613     | MRSA     | 8  | t008       | IVa            | USA300 | 2010 | HC3   | Missouri     | Inpatient    | Wound          |
| PFESA1888   | ERS410558     | MRSA     | 8  | t008       | IVa            | USA300 | 2010 | HC3   | Missouri     | Inpatient    | Other          |

Table S1. Description of 191 CC8 *S. aureus* isolates analysed in this study.

| Public name | ENA accession | Organism | ST | <i>spa</i> | SCC <i>mec</i> | Clone  | Year | HC ID | State        | Patient type | Infection type |
|-------------|---------------|----------|----|------------|----------------|--------|------|-------|--------------|--------------|----------------|
| PFESA1889   | ERS410566     | MRSA     | 8  | t008       | IVa            | USA300 | 2010 | HC3   | Missouri     | Inpatient    | Other          |
| PFESA1977   | ERS432053     | MRSA     | 8  | t008       | IVa            | USA300 | 2010 | HC10  | Georgia      | Outpatient   | Other          |
| PFESA1978   | ERS432061     | MRSA     | 8  | t008       | IVa            | USA300 | 2010 | HC10  | Georgia      | Outpatient   | Other          |
| PFESA2055   | ERS365779     | MRSA     | 8  | t008       | IVa            | USA300 | 2009 | HC7   | Texas        | Inpatient    | Invasive       |
| PFESA2057   | ERS365795     | MRSA     | 8  | t008       | IVa            | USA300 | 2009 | HC7   | Texas        | Inpatient    | Invasive       |
| PFESA2059   | ERS365811     | MRSA     | 8  | t008       | IVa            | USA300 | 2009 | HC7   | Texas        | Inpatient    | Other          |
| PFESA2062   | ERS365827     | MRSA     | 8  | t008       | IVa            | USA300 | 2010 | HC7   | Texas        | Inpatient    | Wound          |
| PFESA2063   | ERS365740     | MRSA     | 8  | t008       | IVa            | USA300 | 2009 | HC7   | Texas        | Inpatient    | Wound          |
| PFESA2067   | ERS365772     | MSSA     | 8  | t008       | IVa            | USA300 | 2009 | HC7   | Texas        | Inpatient    | Other          |
| PFESA2074   | ERS365828     | MRSA     | 8  | t008       | IVa            | USA300 | 2009 | HC7   | Texas        | Inpatient    | Wound          |
| PFESA2075   | ERS410365     | MRSA     | 8  | t008       | IVa            | USA300 | 2010 | HC7   | Texas        | Outpatient   | Invasive       |
| PFESA2077   | ERS365749     | MRSA     | 8  | t008       | IVa            | USA300 | 2010 | HC1   | Florida      | Inpatient    | Wound          |
| PFESA2090   | ERS365758     | MRSA     | 8  | t008       | IVa            | USA300 | 2010 | HC1   | Florida      | Inpatient    | Wound          |
| PFESA2098   | ERS365822     | MRSA     | 8  | t008       | IVa            | USA300 | 2010 | HC1   | Florida      | Inpatient    | Wound          |
| PFESA2103   | ERS365767     | MRSA     | 8  | t008       | IVa            | USA300 | 2010 | HC1   | Florida      | Inpatient    | Respiratory    |
| PFESA2104   | ERS365775     | MRSA     | 8  | t008       | IVa            | USA300 | 2010 | HC1   | Florida      | Inpatient    | Respiratory    |
| PFESA2153   | ERS410377     | MRSA     | 8  | t008       | IVa            | USA300 | 2010 | HC2   | Michigan     | Outpatient   | Other          |
| PFESA2157   | ERS365791     | MRSA     | 8  | t008       | IVa            | USA300 | 2010 | HC2   | Michigan     | Inpatient    | Wound          |
| PFESA2158   | ERS410401     | MRSA     | 8  | t008       | IVa            | USA300 | 2010 | HC2   | Michigan     | Outpatient   | Other          |
| PFESA2163   | ERS410409     | MRSA     | 8  | t008       | IVa            | USA300 | 2010 | HC2   | Michigan     | Outpatient   | Wound          |
| PFESA2164   | ERS365831     | MRSA     | 8  | t008       | IVa            | USA300 | 2010 | HC2   | Michigan     | Inpatient    | Wound          |
| PFESA2166   | ERS410417     | MRSA     | 8  | t008       | IVa            | USA300 | 2010 | HC2   | Michigan     | Outpatient   | Other          |
| PFESA2169   | ERS410441     | MRSA     | 8  | t008       | IVa            | USA300 | 2010 | HC2   | Michigan     | Outpatient   | Wound          |
| PFESA2188   | ERS410387     | MRSA     | 8  | t008       | IVa            | USA300 | 2009 | HC11  | Florida      | Inpatient    | Respiratory    |
| PFESA2192   | ERS410419     | MRSA     | 8  | t008       | IVa            | USA300 | 2009 | HC12  | Pennsylvania | Outpatient   | Wound          |

Table S1. Description of 191 CC8 *S. aureus* isolates analysed in this study. For *spa* and *SCCmec* columns NT refers to non-typeable.

| Public name | ENA accession | Organism | ST | <i>spa</i> | <i>SCCmec</i> | Clone  | Year | HC ID | State        | Patient type | Infection type |
|-------------|---------------|----------|----|------------|---------------|--------|------|-------|--------------|--------------|----------------|
| PFESA2193   | ERS410427     | MRSA     | 8  | t008       | IVa           | USA300 | 2009 | HC12  | Pennsylvania | Inpatient    | Wound          |
| PFESA2272   | ERS410276     | MRSA     | 8  | t008       | IVa           | USA300 | 2010 | HC6   | Tennessee    | Outpatient   | Wound          |
| PFESA2273   | ERS410284     | MRSA     | 8  | t008       | IVa           | USA300 | 2010 | HC6   | Tennessee    | Outpatient   | Other          |
| PFESA2282   | ERS365745     | MRSA     | 8  | t008       | IVa           | USA300 | 2010 | HC6   | Tennessee    | Inpatient    | Respiratory    |
| PFESA2283   | ERS410300     | MRSA     | 8  | t008       | IVa           | USA300 | 2010 | HC6   | Tennessee    | Outpatient   | Other          |
| PFESA2285   | ERS410308     | MRSA     | 8  | t008       | IVa           | USA300 | 2010 | HC6   | Tennessee    | Outpatient   | Other          |
| PFESA2329   | ERS410318     | MRSA     | 8  | t008       | IVa           | USA300 | 2010 | HC8   | Wisconsin    | Outpatient   | Other          |
| PFESA2431   | ERS410207     | MRSA     | 8  | t008       | IVa           | USA300 | 2010 | HC5   | Pennsylvania | Inpatient    | Respiratory    |
| PFESA2435   | ERS410239     | MRSA     | 8  | t008       | IVa           | USA300 | 2010 | HC5   | Pennsylvania | Inpatient    | Respiratory    |
| PFESA2293   | ERS365809     | MRSA     | 8  | t008       | IVg           | -      | 2010 | HC2   | Michigan     | Inpatient    | Invasive       |
| PFESA2056   | ERS365787     | MRSA     | 8  | t008       | NT            | USA300 | 2009 | HC7   | Texas        | Inpatient    | Respiratory    |
| PFESA1884   | ERS410621     | MSSA     | 8  | t024       | -             | -      | 2009 | HC3   | Missouri     | Inpatient    | Other          |
| PFESA2176   | ERS410386     | MSSA     | 8  | t024       | -             | USA300 | 2009 | HC11  | Florida      | Inpatient    | Wound          |
| PFESA1304   | ERS411131     | MRSA     | 8  | t024       | IVa           | USA300 | 2004 | HC7   | Texas        | Inpatient    | Invasive       |
| PFESA1337   | ERS410961     | MRSA     | 8  | t024       | IVa           | USA300 | 2004 | HC1   | Florida      | Outpatient   | Other          |
| PFESA1346   | ERS411189     | MRSA     | 8  | t024       | IVa           | USA300 | 2004 | HC1   | Florida      | Inpatient    | Wound          |
| PFESA1388   | ERS410996     | MRSA     | 8  | t024       | IVa           | USA300 | 2004 | HC6   | Tennessee    | Outpatient   | Invasive       |
| PFESA1598   | ERS410756     | MRSA     | 8  | t024       | IVa           | USA300 | 2009 | HC6   | Tennessee    | Outpatient   | Other          |
| PFESA2156   | ERS410393     | MRSA     | 8  | t024       | IVa           | USA300 | 2010 | HC2   | Michigan     | Outpatient   | Other          |
| PFESA2469   | ERS432172     | MRSA     | 8  | t024       | IVa           | USA300 | 2010 | HC9   | Wisconsin    | Inpatient    | Wound          |
| PFESA1795   | ERS410677     | MSSA     | 8  | t064       | -             | -      | 2009 | HC5   | Pennsylvania | Inpatient    | Respiratory    |
| PFESA2439   | ERS432122     | MSSA     | 8  | t064       | -             | -      | 2010 | HC5   | Pennsylvania | Inpatient    | Respiratory    |
| PFESA1318   | ERS411140     | MRSA     | 8  | t064       | IVd           | USA500 | 2004 | HC7   | Texas        | Inpatient    | Wound          |
| PFESA1351   | ERS410938     | MRSA     | 8  | t064       | IVd           | USA500 | 2004 | HC10  | Georgia      | Outpatient   | Wound          |
| PFESA1361   | ERS411165     | MRSA     | 8  | t064       | IVd           | USA500 | 2004 | HC10  | Georgia      | Inpatient    | Invasive       |

Table S1. Description of 191 CC8 *S. aureus* isolates analysed in this study.

| Public name | ENA accession | Organism | ST | <i>spa</i> | SCC <i>mec</i> | Clone       | Year | HC ID | State        | Patient type | Infection type |
|-------------|---------------|----------|----|------------|----------------|-------------|------|-------|--------------|--------------|----------------|
| PFESA1987   | ERS365739     | MRSA     | 8  | t064       | IVd            | USA500      | 2010 | HC10  | Georgia      | Inpatient    | Invasive       |
| PFESA1974   | ERS411168     | MRSA     | 8  | t064       | IVg            | USA500-like | 2009 | HC10  | Georgia      | Inpatient    | Respiratory    |
| PFESA1980   | ERS432077     | MRSA     | 8  | t064       | IVg            | USA500-like | 2010 | HC10  | Georgia      | Outpatient   | Other          |
| PFESA1984   | ERS411200     | MRSA     | 8  | t064       | IVg            | USA500-like | 2010 | HC10  | Georgia      | Inpatient    | Respiratory    |
| PFESA1985   | ERS411208     | MRSA     | 8  | t064       | IVg            | USA500-like | 2010 | HC10  | Georgia      | Inpatient    | Invasive       |
| PFESA2086   | ERS365821     | MRSA     | 8  | t064       | IVg            | USA500-like | 2010 | HC1   | Florida      | Inpatient    | Wound          |
| PFESA2199   | ERS410380     | MRSA     | 8  | t064       | IVg            | USA500-like | 2010 | HC12  | Pennsylvania | Inpatient    | Respiratory    |
| PFESA1327   | ERS411120     | MRSA     | 8  | t068       | IVa            | USA300      | 2004 | HC1   | Florida      | Outpatient   | Wound          |
| PFESA1367   | ERS410947     | MRSA     | 8  | t121       | IVa            | USA300      | 2004 | HC10  | Georgia      | Outpatient   | Other          |
| PFESA2281   | ERS234133     | MRSA     | 8  | t121       | IVa            | USA300      | 2010 | HC6   | Tennessee    | Inpatient    | Respiratory    |
| PFESA2277   | ERS365808     | MSSA     | 8  | t1348      | -              | -           | 2010 | HC6   | Tennessee    | Inpatient    | Wound          |
| PFESA2087   | ERS365829     | MRSA     | 8  | t1578      | IVa            | USA300      | 2010 | HC1   | Florida      | Inpatient    | Wound          |
| PFESA1989   | ERS365755     | MSSA     | 8  | t1705      | -              | -           | 2010 | HC10  | Georgia      | Inpatient    | Other          |
| PFESA2094   | ERS365790     | MSSA     | 8  | t1882      | -              | -           | 2010 | HC1   | Florida      | Inpatient    | Respiratory    |
| PFESA2170   | ERS410449     | MRSA     | 8  | t211       | IVa            | USA300      | 2010 | HC2   | Michigan     | Outpatient   | Other          |
| PFESA2187   | ERS410379     | MSSA     | 8  | t2179      | -              | USA300      | 2009 | HC11  | Florida      | Inpatient    | Wound          |
| PFESA1390   | ERS411142     | MSSA     | 8  | t2558      | -              | -           | 2004 | HC6   | Tennessee    | Inpatient    | Other          |
| PFESA2331   | ERS410334     | MSSA     | 8  | t3240      | -              | -           | 2010 | HC8   | Wisconsin    | Outpatient   | Wound          |
| PFESA1478   | ERS410906     | MSSA     | 8  | t334       | -              | -           | 2009 | HC8   | Wisconsin    | Inpatient    | Respiratory    |
| PFESA2280   | ERS365824     | MSSA     | 8  | t334       | -              | -           | 2010 | HC6   | Tennessee    | Inpatient    | Respiratory    |
| PFESA1370   | ERS410963     | MRSA     | 8  | t4166      | IVa            | USA300      | 2004 | HC10  | Georgia      | Outpatient   | Other          |
| PFESA1890   | ERS410574     | MRSA     | 8  | t622       | IVa            | USA300      | 2010 | HC3   | Missouri     | Inpatient    | Wound          |
| PFESA1982   | ERS432085     | MRSA     | 8  | t622       | IVa            | USA300      | 2010 | HC10  | Georgia      | Outpatient   | Other          |
| PFESA1981   | ERS411192     | MRSA     | 8  | t681       | IVa            | USA300      | 2010 | HC10  | Georgia      | Inpatient    | Respiratory    |
| PFESA1990   | ERS365763     | MRSA     | 8  | t681       | IVa            | USA300      | 2010 | HC10  | Georgia      | Inpatient    | Other          |

Table S1. Description of 191 CC8 *S. aureus* isolates analysed in this study. For *spa* and *SCCmec* columns NT refers to non-typeable.

| Public name | ENA accession | Organism | ST   | <i>spa</i> | <i>SCCmec</i> | Clone  | Year | HC ID | State        | Patient type | Infection type |
|-------------|---------------|----------|------|------------|---------------|--------|------|-------|--------------|--------------|----------------|
| PFESA2763   | ERS409806     | MRSA     | 8    | t681       | IVa           | USA300 | 2010 | HC2   | Michigan     | unknown      | Other          |
| PFESA2742   | ERS409790     | MSSA     | 8    | t8286      | -             | -      | 2010 | HC2   | Michigan     | unknown      | Other          |
| PFESA1344   | ERS411001     | MRSA     | 8    | NT         | IVa           | USA300 | 2004 | HC1   | Florida      | Outpatient   | Wound          |
| PFESA1988   | ERS365747     | MRSA     | 8    | NT         | IVa           | USA300 | 2009 | HC10  | Georgia      | Inpatient    | Invasive       |
| PFESA2330   | ERS410326     | MSSA     | 976  | t008       | -             | -      | 2010 | HC8   | Wisconsin    | Outpatient   | Other          |
| PFESA2279   | ERS365816     | MSSA     | 1150 | NT         | -             | -      | 2010 | HC6   | Tennessee    | Inpatient    | Wound          |
| PFESA1548   | ERS410896     | MRSA     | 2253 | t008       | IVg           | -      | 2010 | HC12  | Pennsylvania | Inpatient    | Invasive       |
| PFESA2189   | ERS410395     | MRSA     | 2253 | t008       | IVg           | -      | 2010 | HC12  | Pennsylvania | Inpatient    | Wound          |
| PFESA2203   | ERS410412     | MRSA     | 2253 | t008       | IVg           | -      | 2010 | HC12  | Pennsylvania | Inpatient    | Wound          |
| PFESA2073   | ERS365820     | MRSA     | 2319 | t008       | IVa           | USA300 | 2009 | HC7   | Texas        | Inpatient    | Wound          |
| PFESA1617   | ERS410789     | MRSA     | 3000 | t008       | IVa           | USA300 | 2010 | HC4   | New York     | Inpatient    | Wound          |
| PFESA2473   | ERS432204     | MSSA     | 3001 | t121       | -             | -      | 2010 | HC9   | Wisconsin    | Inpatient    | Wound          |
| PFESA2278   | ERS410292     | MRSA     | 3007 | t008       | IVa           | USA300 | 2010 | HC6   | Tennessee    | Outpatient   | Wound          |
| PFESA1983   | ERS432093     | MRSA     | 3008 | t008       | IVa           | USA300 | 2010 | HC10  | Georgia      | Outpatient   | Other          |
| PFESA2054   | ERS409812     | MRSA     | 3010 | t008       | IVa           | USA300 | 2009 | HC7   | Texas        | Outpatient   | Wound          |
| PFESA1542   | ERS410848     | MRSA     | 3015 | t008       | IVa           | USA300 | 2009 | HC12  | Pennsylvania | Inpatient    | Other          |



**Figure S1. Midpoint-rooted phylogenetic tree of analysed *S. aureus* CC8 isolates with distribution of MGE-associated virulence and resistance genes.** Four reference genomes were included (corresponding nodes marked with a star). Branches of USA300, USA500 and USA500-like clades have been highlighted. The tree has been annotated to show the variable distribution of virulence genes associated with prophages  $\phi$ Sa2 (*pvl*) and  $\phi$ Sa3 (*sak*, *scn*, *chp*, *seK*, *seQ*, *seA*) as well as the distribution of antimicrobial resistance genes associated with plasmids pUSA300HOUMR-like (*blaZ*, *smrA*, *mphBM*, *aphA-3*, *bcrA*, *sat*) and pUSA03-like (*ileS*, *aadD*).

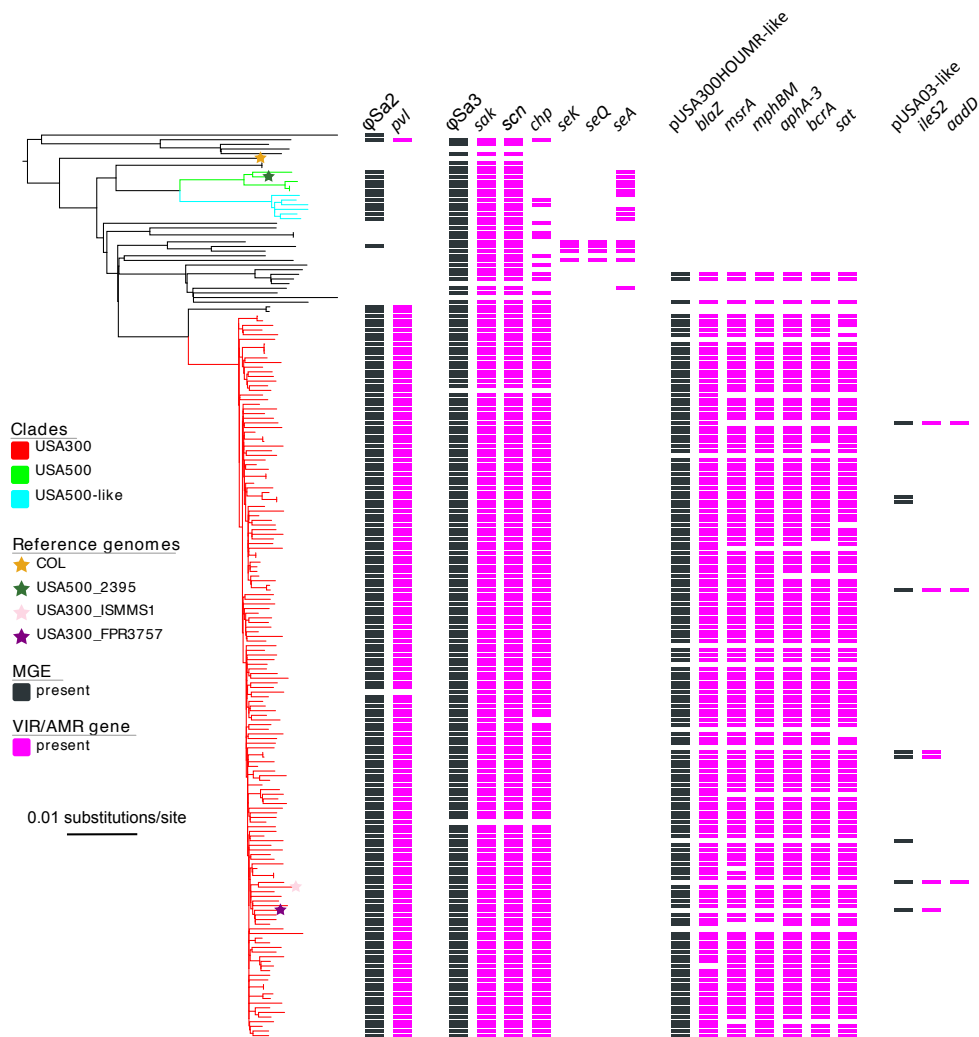

**Figure S2. Comparative alignment of recombinant variants of SCCmec and ACME elements identified in USA300 isolates.** (a) Alignment of SCCmec-ACME hybrid identified in isolate PFESA2056 to SCCmecIVa-ACME region of *S. aureus* USA300\_FPR3757 strain. (b) Alignment of SCCmec hybrid identified in isolate PFESA2090 to sequence of SCCmec IVa from USA300\_FPR3757 and SCCmec V (5&5C2) from *S. aureus* JCSC6944 strains. (c) Alignment of region containing remnant SCC and ACME element identified in isolate PFESA2064 to SCCmecIVa-ACME region of USA300\_FPR3757 strain and SCCpbp4 from *S. epidermidis* ATCC 12228. Alignment figures were constructed using Easyfig software v 2.1

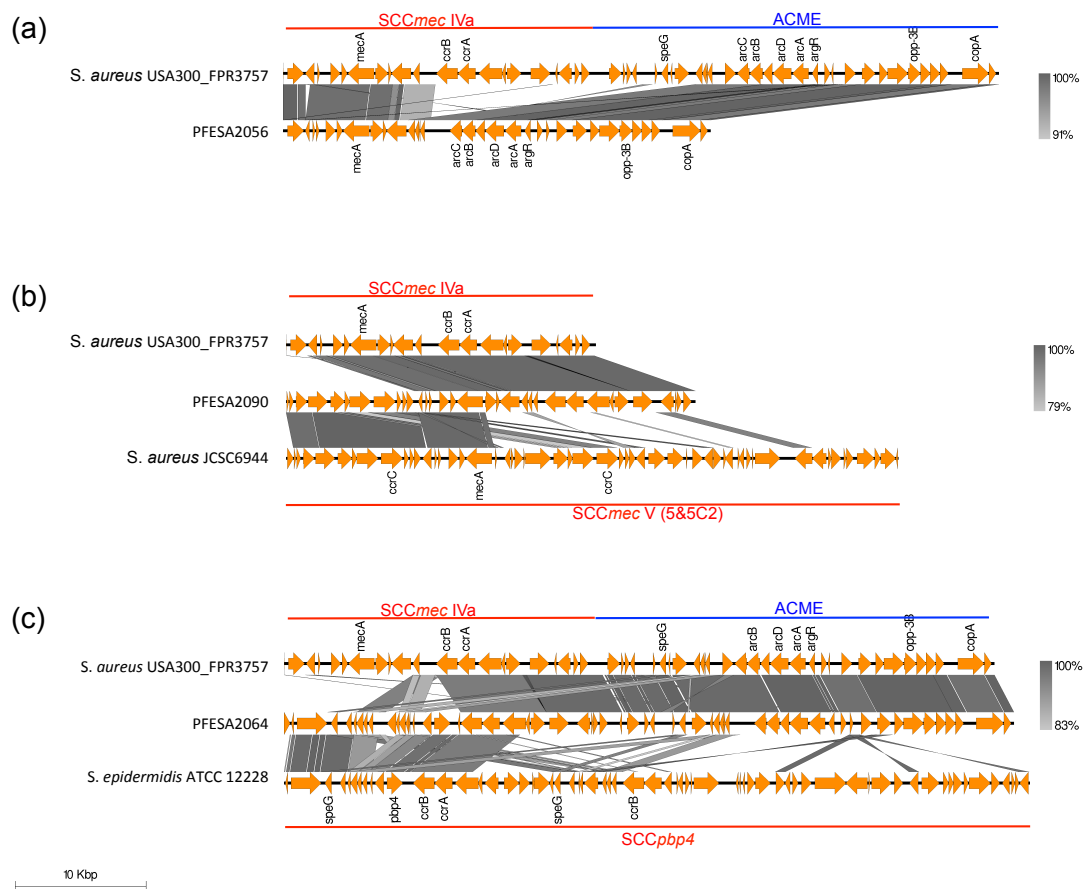

**Figure S3. Midpoint-rooted phylogenetic tree of analysed *S. aureus* CC8 isolates showing distribution of the ICE6013 mobile genetic element.** Four reference genomes were included (corresponding nodes marked with a star). Branches of USA300, USA500 and USA500-like clades have been highlighted. Tree has been annotated to show correlation between phylogenetic distribution and, starting from the innermost annotation circle, ICE6013 carriage, ICE6013 insertion type (intergenic or intragenic) and ICE6013 insertion site. For the latter, name of the coding sequence from USA300\_FPR3757 reference genome was used, for intergenic location sites names of the flanking coding sequences are provided.

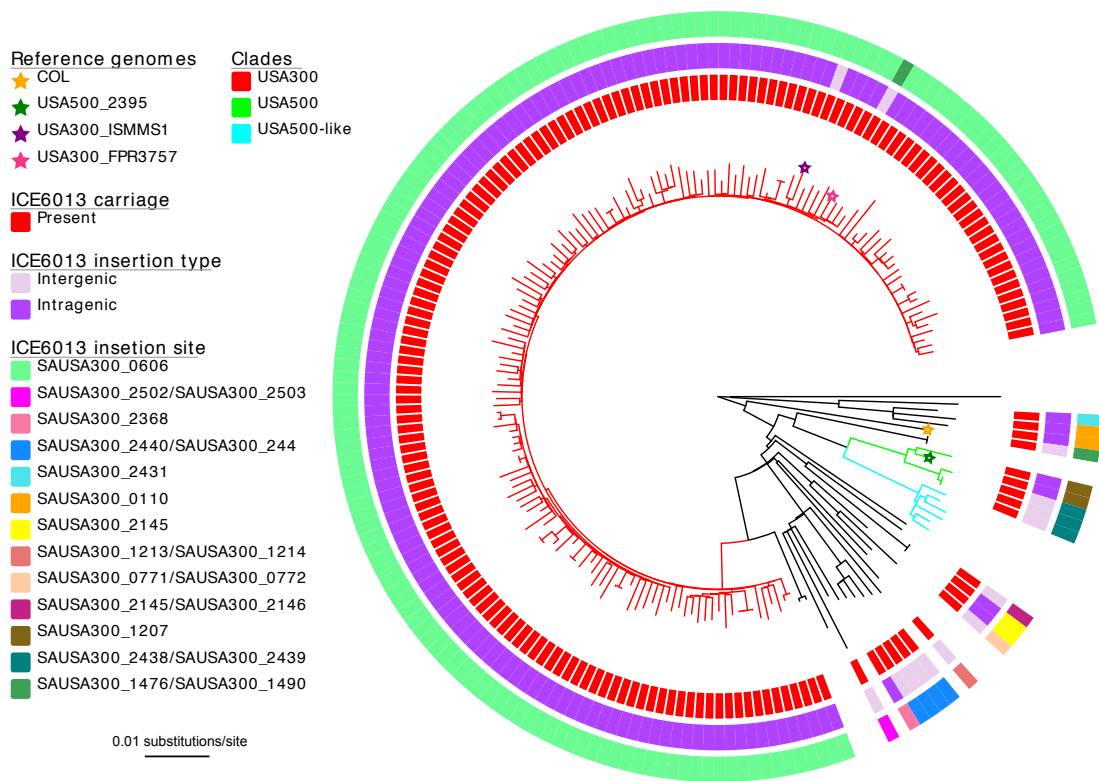

**Figure S4. Mid-point rooted phylogenetic tree of 483 *S. aureus* USA300 isolates.**

The phylogeny consists of 154 USA300 isolates analysed in this study together with 329 previously published USA300 genomes derived from New York City (Uhlemann, Dordel et al. 2014). Two most closely related non-USA300 isolates were included as an out-group (isolates PFESA2332 and PFESA1492, branches coloured in red). Branches were coloured to highlight the phylogeny's nested clade structure. Clades were labelled from 1 to 6, to illustrate a parallel population structure between USA300 isolates analysed in this study and this expanded collection. SNPs that define each labelled clade correspond to previously described polymorphisms (Table 1), except for clade 5 where mutation at site corresponding to 1374405 position in USA300\_FPR3757, was detected as C → T transition (5a) followed by T → A transversion (5b), in contrast to previously described single step C → A transversion. Two reference genomes were included and corresponding nodes are marked with a star.

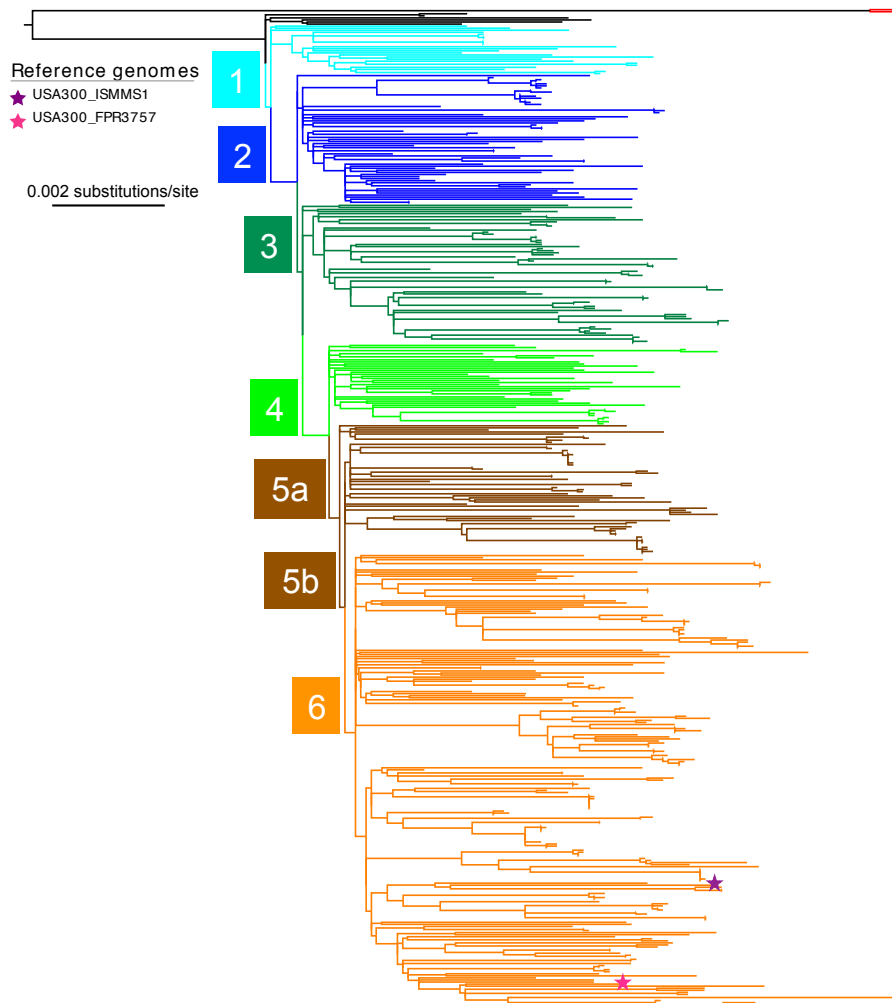

Supplement: mgen-02-58-s001.pdf [file mgen-02-58-s001.pdf]
